# Supplementary material for: Genome-Wide Association Study to Map Genomic Regions Related to the Initiation Time of Four Growth Stage Traits in Soybean
Source: Front Genet. 2021 Sep 14;12:715529. doi: 10.3389/fgene.2021.715529 (PMC8476948; doi:10.3389/fgene.2021.715529)
Supplement: Supplementary Table 1 — Phenotypic data of four growth stage traits in 309 summer soybeans across different datasets. [file Table_1.XLSX]

## Sheet: Sheet1
Supplementary Table 1. Phenotypic data of four growth stage traits in 309 summer soybeans across different datasets.
No.	Marterials	Days to flowering(DF)							Days to pod beginning(DPB)							Days to seed formation(DSF)							Days to maturity initiation (DMI)
		BLUP	18JP	18YC	19DT	19JP	19YC6	19YC7	BLUP	18JP	18YC	19DT	19JP	19YC6	19YC7	BLUP	18JP	18YC	19DT	19JP	19YC6	19YC7	BLUP	18JP	18YC	19DT	19JP	19YC6	19YC7
1	P001	47.7403	43	54	46	47	52	47	60.8524	54	66	61	60	66	59	69.5829	61	76	67	70	76	69	102.982	98	107	95	98	113	101
2	P004	44.0411	41	51	43	42	47	41	58.6392	53	64	63	58	63	51	66.9552	64	74	66	68	68	62	103.225	98	108	98	98	113	102
3	P005	46.7007	42	55	44	44	49	47	62.9736	57	72	65	60	68	57	72.3017	66	78	76	72	80	64	110.587	108	122	104	108	121	110
4	P006	44.0122	44	48	43	42	45	42	62.2196	59	70	67	53	69	57	71.6546	70	81	76	64	77	65	107.941	107	121	104	107	120	107
5	P007	41.2262	36	44	38	41	47	41	52.949	47	54	50	55	57	51	62.4362	57	60	61	71	65	60	97.9	95	101	90	95	103	94
6	P010	42.2496	42	46	42	39	44	40	55.7575	56	55	60	52	61	51	66.5402	70	68	66	66	69	61	101.195	101	107	95	101	107	100
7	P011	39.8974	36	42	38	37	44	41	52.493	48	52	53	50	58	52	62.2069	57	62	61	64	66	62	98.1664	99	104	88	99	103	97
8	P012	48.6383	44	55	46	45	55	48	61.9279	57	67	63	60	68	57	71.7313	67	76	71	71	83	65	105.361	104	116	98	104	114	100
9	P015	47.0436	43	52	43	41	56	48	61.9115	57	67	65	56	69	58	73.8915	72	79	75	71	84	65	110.337	113	122	106	113	121	109
10	P017	39.1512	36	41	39	39	41	39	50.1083	49	50	51	48	53	49	59.9303	57	58	60	61	63	58	92.6539	100	94	84	100	96	88
11	P018	40.2048	36	42	40	39	43	40	51.3794	47	51	55	49	57	49	62.4866	61	59	64	62	65	62	96.7289	98	100	94	98	103	89
12	P019	39.012	37	44	36	35	42	39	56.1782	51	60	60	49	65	51	65.778	60	72	64	62	76	60	101.518	103	110	98	103	108	99
13	P020	47.6465	44	54	44	47	49	49	62.1268	58	67	63	62	67	58	69.1575	63	74	68	72	76	64	105.947	109	114	98	109	115	101
14	P023	41.5115	37	45	44	39	44	40	52.6568	48	53	53	51	59	51	62.4323	59	60	62	63	68	62	98.9314	97	107	94	97	101	97
15	P024	50.6143	49	55	49	49	55	49	61.8599	55	65	62	62	67	58	68.8395	62	71	69	71	75	66	107.855	112	114	101	112	116	106
16	P028	40.9449	39	45	40	39	42	40	51.7015	49	52	52	51	56	49	61.4912	57	62	60	66	64	58	95.8294	94	98	86	94	100	96
17	P029	49.4641	45	54	50	47	55	48	63.4161	58	72	66	59	69	57	72.804	71	80	75	71	78	65	111.097	120	122	105	120	122	106
18	P030	39.2716	37	42	38	37	41	40	52.9175	53	53	55	53	54	50	61.5643	62	62	62	62	64	57	97.639	97	101	91	97	103	94
19	P036	42.8089	44	44	42	41	43	43	55.601	57	53	58	56	59	51	65.277	69	62	65	68	68	59	102.146	107	108	96	107	103	100
20	P038	44.5458	43	47	42	44	49	43	61.6681	56	65	65	62	67	56	70.9325	70	75	73	71	75	63	105.247	99	114	101	99	114	105
21	P039	37.8147	36	40	36	35	40	44	50.729	48	51	50	46	53	54	60.5358	58	57	60	59	61	64	100.857	110	97	88	110	111	100
22	P042	46.6802	43	55	42	45	50	47	61.5785	58	68	63	59	66	57	69.3735	67	74	68	69	75	65	104.632	105	116	99	105	112	100
23	P043	47.2614	42	56	45	47	49	47	61.209	55	68	62	59	67	56	69.728	67	76	69	70	75	63	105.72	107	114	98	107	114	102
24	P044	38.1674	36	39	36	37	48	44	50.3837	46	49	47	47	63	57	60.2315	57	57	56	61	72	64	98.0087	107	92	83	107	111	94
25	P046	45.5442	40	47	45	47	48	44	58.4478	52	57	62	59	63	54	66.7419	60	65	68	70	72	63	102.21	99	104	101	99	111	100
26	P047	42.4895	41	46	40	40	46	41	53.9926	51	55	55	53	59	51	62.9817	62	64	62	63	66	60	100.496	101	105	93	101	103	98
27	P051	46.2564	42	55	44	42	49	47	62.9614	57	70	65	62	68	58	72.6374	72	81	74	70	78	65	107.193	107	121	103	107	118	104
28	P052	40.6918	43	39	41	38	43	40	52.1199	55	48	54	50	56	50	61.8267	65	56	63	64	64	58	95.7988	103	96	87	103	101	88
29	P054	40.6855	36	42	41	41	43	39	52.5682	47	53	53	54	55	50	61.6821	57	61	61	66	64	58	98.9058	102	101	94	102	103	88
30	P059	40.0629	38	43	38	39	41	40	54.3043	52	55	54	54	60	52	64.3669	63	66	62	66	67	61	100.195	98	108	93	98	102	98
31	P060	40.0232	39	40	40	37	43	40	50.373	48	47	51	47	56	51	60.3954	60	55	61	60	64	60	94.3568	112	93	85	112	94	89
32	P061	42.1953	43	44	42	37	48	44	58.0835	57	62	64	51	63	51	69.0181	71	75	71	65	72	58	104.597	108	116	97	108	111	100
33	P063	39.0522	45	41	34	33	48	44	54.9651	50	59	55	50	63	57	66.181	60	70	65	64	72	68	104.143	114	107	98	114	111	100
34	P066	51.4452	49	60	50	46	55	51	65.4637	61	72	66	66	68	63	75.2149	72	81	76	72	85	70	108.294	109	120	101	109	121	103
35	P068	41.7251	38	45	44	39	44	41	54.4031	54	55	53	52	57	55	62.5954	61	62	62	63	64	61	97.1467	93	104	95	93	101	88
36	P069	43.7524	39	54	39	42	48	43	61.3963	56	70	63	54	68	57	71.3856	71	79	70	66	77	68	108.05	105	121	101	105	118	105
37	P070	44.7657	39	54	44	41	47	44	58.7518	53	65	62	52	64	56	67.6205	62	74	67	64	75	65	102.143	99	111	96	99	113	102
38	P071	48.2873	42	53	45	48	53	49	60.3882	54	64	61	60	65	58	69.3434	64	73	67	71	75	68	104.393	107	112	98	107	115	98
39	P072	46.1619	41	54	45	44	49	44	60.6029	50	65	63	60	66	55	68.5028	60	74	68	71	75	64	103.74	105	110	98	105	114	99
40	P075	35.3617	35	40	35	32	36	33	46.5997	50	53	44	41	43	49	60.0292	61	67	55	61	51	64	97.6057	96	108	90	96	103	97
41	P076	44.1363	38	44	44	44	49	46	58.2501	45	63	60	56	68	57	70.943	64	77	67	69	83	68	108.792	108	116	101	108	120	111
42	P080	46.505	41	52	48	44	49	47	61.7829	55	68	66	60	66	57	68.5921	65	74	71	70	70	64	104.888	100	113	100	100	114	102
43	P082	39.0665	36	41	39	36	42	39	50.6454	47	51	52	49	54	50	61.7807	59	61	61	64	64	60	98.6453	102	98	89	102	103	99
44	P083	42.0756	39	46	43	40	44	40	55.03	54	54	59	52	62	50	63.484	60	65	66	63	69	58	101.453	107	107	96	107	107	90
45	P086	44.1812	39	47	44	43	47	46	59.7026	53	62	62	59	65	58	68.7088	62	73	68	70	76	65	103.146	100	113	99	100	112	99
46	P087	48.5143	45	53	46	45	53	49	61.8619	58	66	62	60	67	58	70.0351	65	74	69	71	76	68	105.613	103	115	99	103	114	102
47	P088	41.1264	39	43	42	39	43	40	52.7585	52	51	55	51	57	51	62.4238	64	59	61	67	64	60	99.7278	99	99	94	99	103	98
48	P090	40.3498	37	43	40	40	41	41	53.0461	49	54	55	53	55	51	62.0999	57	62	63	65	65	59	97.8957	97	99	95	97	101	97
49	P092	41.2582	39	44	41	41	42	40	53.6666	49	52	58	56	53	51	62.466	59	59	67	68	63	59	97.3764	99	97	96	99	98	96
50	P095	40.8725	36	46	39	40	43	41	53.7838	51	55	55	53	58	51	62.3235	56	62	63	65	65	61	97.6619	101	100	98	101	100	89
51	P098	50.1618	45	57	47	48	56	50	64.3052	60	67	65	61	70	64	73.5068	67	77	74	71	83	71	109.182	108	119	101	108	119	109
52	P099	39.9769	38	40	38	39	48	44	48.277	47	48	49	47	63	54	61.486	64	55	60	62	72	63	101.752	112	96	88	112	111	110
53	P101	38.8076	35	40	40	38	40	38	51.6353	47	53	53	54	54	48	61.0405	57	62	61	63	64	57	95.7125	95	97	92	95	97	96
54	P103	50.1184	45	57	49	47	56	49	63.9492	60	71	65	63	68	59	72.8825	71	78	74	72	76	68	106.497	108	121	100	108	119	93
55	P106	39.8494	37	43	38	40	41	39	51.4729	48	53	51	50	57	50	61.6964	57	63	61	64	65	58	92.6491	92	98	83	92	98	89
56	P107	45.8678	40	55	43	43	49	46	62.7593	56	70	66	62	68	56	72.2406	71	78	74	70	77	67	110.415	107	122	105	107	120	110
57	P110	41.4441	39	43	42	41	44	40	52.3396	50	51	53	54	57	50	61.4511	58	60	62	65	64	58	98.6422	108	97	94	108	103	92
58	P111	39.471	37	43	37	40	41	37	53.9428	42	56	50	52	64	50	63.6719	56	69	62	70	68	58	102.869	98	113	95	98	120	92
59	P112	51.9428	51	56	50	51	55	50	64.3414	62	70	64	63	68	62	74.3488	74	78	71	71	84	72	105.885	107	116	100	107	119	102
60	P115	48.2208	44	56	43	45	56	48	61.7902	57	67	63	59	68	58	71.6021	69	75	70	70	83	65	105.463	107	115	99	107	110	104
61	P117	49.6839	45	55	46	49	56	49	63.9772	56	71	64	63	69	61	73.1174	65	79	72	72	83	70	108.187	108	121	100	108	117	107
62	P118	36.4786	35	42	33	34	39	34	52.5938	47	54	50	51	61	51	62.2139	58	64	62	62	67	59	103.171	108	111	95	108	112	94
63	P124	51.6926	50	60	49	48	56	50	66.7389	62	76	67	61	74	63	76.2266	75	83	77	71	83	72	110.176	112	122	104	112	121	109
64	P128	44.8225	41	44	44	44	49	47	59.6036	58	55	63	57	68	57	68.2426	63	65	69	68	76	70	103.071	105	105	98	105	117	103
65	P129	46.3961	43	52	44	45	49	46	61.3563	57	67	63	59	66	57	70.4371	67	77	71	70	75	64	105.238	105	115	100	105	115	104
66	P137	47.6961	44	49	45	47	55	48	60.7507	54	64	61	59	68	58	69.684	60	75	69	70	76	70	103.676	105	109	95	105	117	104
67	P138	51.0779	47	55	49	51	57	50	66.1356	61	73	67	64	73	61	76.0349	74	82	76	74	84	70	108.77	107	120	102	107	119	105
68	P139	42.6156	40	46	40	40	47	42	57.0671	53	56	59	58	63	53	66.265	60	71	66	70	69	62	102.324	102	109	98	102	111	97
69	P141	46.8402	47	52	45	45	50	44	61.3354	58	65	66	59	68	54	71.0866	68	75	76	71	76	63	108.898	115	117	103	115	118	103
70	P146	40.5331	39	50	39	36	40	39	53.8027	51	59	52	51	59	50	64.0032	61	72	62	63	67	59	97.7664	100	101	93	100	102	93
71	P149	50.557	46	57	50	48	56	49	62.9638	56	69	64	61	69	59	71.8291	69	78	73	71	75	67	108.491	108	118	102	108	119	106
72	P154	40.4047	37	41	40	38	41	46	51.8081	48	50	52	51	55	53	60.4411	57	57	60	62	64	60	94.2695	107	93	82	107	92	95
73	P157	46.412	43	52	46	43	49	46	60.3088	48	67	60	60	64	56	67.4818	60	75	67	70	70	64	106.404	105	112	100	105	116	105
74	P159	44.837	39	52	43	40	49	46	59.7236	54	66	60	56	66	57	68.7305	60	74	68	69	75	66	103.871	98	110	98	98	115	102
75	P160	46.3998	43	53	44	42	49	48	61.975	50	67	63	61	66	60	69.2145	59	74	68	70	75	70	104.494	101	111	98	101	113	106
76	P163	42.0504	40	47	41	42	42	40	55.1022	53	57	57	57	56	52	64.2716	59	67	64	70	67	59	102.699	103	111	95	103	103	100
77	P167	46.7316	43	47	44	48	50	49	58.5505	56	58	54	62	66	56	68.7773	63	72	68	71	75	65	102.67	97	108	98	97	112	100
78	P168	42.2697	42	45	41	42	43	41	52.9863	49	53	56	54	55	51	61.1708	58	60	62	64	64	58	97.4706	102	97	94	102	101	97
79	P173	40.3771	37	43	39	39	41	42	50.7706	48	51	49	49	54	52	60.7276	60	58	61	62	63	59	94.0336	95	96	86	95	96	99
80	P176	47.9451	44	54	48	47	49	47	60.9846	55	65	64	60	66	56	69.0108	60	74	69	70	76	66	103.84	93	114	100	93	114	103
81	P177	43.4439	42	49	42	41	45	41	55.7481	53	58	55	55	62	51	64.5491	61	69	65	65	68	59	100.549	100	108	95	100	110	97
82	P179	40.8144	37	44	43	38	42	40	51.7802	48	51	54	49	56	50	61.203	58	58	62	63	65	58	97.7814	115	99	91	115	101	88
83	P180	46.5064	43	49	46	46	49	47	61.0409	55	64	63	61	66	57	69.55	62	74	72	70	75	66	104.556	99	113	102	99	114	99
84	P181	41.3084	39	44	41	40	43	40	50.8912	49	52	51	49	54	50	60.4566	57	61	61	61	64	58	96.4605	98	99	92	98	99	97
85	P185	33.9191	27	37	34	32	48	44	43.7819	45	44	42	40	63	54	52.209	54	48	47	53	72	63	93.7647	103	87	82	103	111	100
86	P187	41.0085	41	43	37	40	48	44	52.7706	49	54	54	51	63	54	62.3899	59	63	62	63	72	63	96.6859	96	105	91	96	111	100
87	P189	39.1512	37	43	39	35	41	39	50.6879	48	53	54	45	53	51	61.5798	56	62	60	60	67	62	100.246	98	105	94	98	113	100
88	P191	49.1877	47	50	50	48	54	49	62.3401	60	65	65	60	68	58	72.7473	72	75	75	70	77	70	109.749	110	121	103	110	121	110
89	P195	47.2756	44	44	47	47	55	49	61.7757	50	61	64	63	68	58	69.0175	57	72	70	71	76	67	106.044	105	114	101	105	113	104
90	P196	41.1819	37	55	37	36	41	40	58.5463	53	68	56	57	66	51	66.6799	58	75	64	69	75	59	103.127	95	116	98	95	113	100
91	P200	52.4653	44	58	51	51	62	51	66.1356	61	73	66	66	72	60	75.0095	77	81	75	71	83	68	109.589	108	121	102	108	120	108
92	P201	44.475	41	51	42	40	48	46	63.4463	59	69	67	60	70	58	72.9168	65	79	74	71	82	68	109.223	106	122	102	106	119	108
93	P203	48.3757	43	56	48	44	54	47	61.8619	56	67	66	59	68	56	69.8201	64	75	73	70	75	64	106.647	109	117	103	109	119	103
94	P205	50.7112	47	57	50	50	55	48	62.5957	57	70	64	61	68	58	69.6503	62	77	68	71	75	66	106.729	108	115	102	108	112	104
95	P208	55.1442	53	58	55	52	63	52	68.4362	58	78	67	68	75	61	76.6537	66	85	77	81	84	70	112.148	118	123	106	118	122	108
96	P209	45.7939	43	48	44	44	49	48	63.3005	57	73	64	60	68	59	72.2998	64	80	72	70	78	73	107.783	103	121	100	103	116	107
97	P210	35.2244	29	40	35	31	41	34	48.4168	41	50	49	44	55	47	58.8411	54	58	61	55	65	57	99.5789	100	100	95	100	113	99
98	P212	48.9921	44	55	47	47	55	48	62.0805	55	67	65	61	68	58	70.6134	67	76	71	70	76	66	108.155	108	117	100	108	117	105
99	P213	44.1008	43	44	42	43	49	44	55.75	54	53	56	56	63	52	65.0466	66	61	64	68	70	62	99.9356	97	97	94	97	113	98
100	P215	45.2338	43	49	43	43	49	45	60.9396	56	66	64	57	68	56	71.5402	74	76	72	71	76	64	105.999	102	115	100	102	114	105
101	P217	51.8144	49	57	50	51	56	50	66.1836	62	73	66	65	72	61	75.5672	67	81	76	80	83	70	109.94	108	122	103	108	121	106
102	P221	41.2336	37	46	41	39	48	44	53.0529	48	55	53	52	63	54	63.3892	59	64	64	64	72	63	97.6964	99	97	95	99	111	100
103	P230	38.4266	36	44	38	33	40	39	52.9252	50	55	55	49	57	50	62.5741	60	67	62	62	65	58	99.0554	94	108	97	94	103	99
104	P231	45.392	47	57	40	38	49	42	62.746	54	74	61	60	65	54	70.2083	64	83	67	71	76	61	106.27	107	121	101	107	114	103
105	P232	51.7276	55	57	49	48	54	50	64.4315	62	67	66	62	73	60	73.7502	67	79	75	72	83	70	110.596	114	121	105	114	121	108
106	P233	49.2246	44	54	47	47	56	49	61.9661	58	66	63	60	68	57	70.1232	70	74	70	70	76	63	105.893	108	115	98	108	115	104
107	P235	40.9101	36	45	43	38	43	40	52.3993	50	53	56	48	56	50	60.8115	56	62	62	60	65	58	97.3145	95	103	93	95	101	96
108	P236	36.5351	35	37	38	32	48	44	47.2831	46	48	49	44	63	54	58.3886	55	57	60	57	72	63	93.9478	97	90	85	97	111	100
109	P237	48.3185	43	55	45	46	55	48	61.2185	50	67	61	59	67	57	68.9012	60	75	67	70	75	66	105.981	103	116	98	103	114	106
110	P239	47.8388	44	55	45	46	51	47	61.7728	55	67	63	61	68	58	68.8733	60	76	68	70	76	64	104.792	105	111	98	105	114	100
111	P240	42.8486	41	45	42	42	47	40	54.5447	49	53	58	53	63	51	61.688	54	63	61	65	67	59	95.4894	94	97	86	94	103	93
112	P243	50.2775	47	56	51	47	55	48	63.2434	59	72	65	60	68	58	70.7249	64	77	73	71	76	64	106.312	110	119	99	110	116	104
113	P245	40.4751	36	44	39	42	42	39	56.0457	44	51	59	57	63	50	63.3226	56	62	66	66	69	59	102.339	101	111	95	101	111	97
114	P249	40.2027	37	43	39	41	41	40	53.713	51	52	54	55	59	51	63.0953	58	61	63	69	66	60	97.1392	95	95	89	95	103	96
115	P250	39.8982	37	44	39	39	41	39	49.9131	46	51	52	46	55	48	60.7743	60	59	61	62	63	58	97.3305	110	99	90	110	102	89
116	P251	38.8891	35	43	41	36	41	38	50.4664	44	52	56	49	53	49	60.7801	57	60	64	61	63	59	99.6591	106	97	92	106	113	98
117	P252	42.498	42	46	41	41	45	40	53.9155	50	53	54	52	63	50	63.3946	62	64	63	64	68	60	98.0666	98	111	97	98	103	93
118	P253	44.6679	42	49	41	42	49	46	57.0524	54	57	57	57	63	53	67.2551	59	69	65	70	79	62	99.1995	98	108	96	98	104	92
119	P256	44.555	42	47	43	44	49	44	60.7164	57	63	63	60	67	56	69.1749	65	71	69	70	76	66	107.351	105	119	100	105	118	104
120	P257	40.5858	39	47	37	36	43	42	57.9356	46	63	56	56	64	53	68.1365	60	75	68	68	77	62	104.746	105	115	99	105	117	99
121	P260	44.6294	43	49	43	44	49	41	61.0883	56	66	62	61	68	55	69.9843	67	75	71	70	75	63	109.381	107	121	102	107	121	105
122	P261	45.8496	42	44	44	47	49	49	59.7792	50	65	56	60	65	58	69.8655	58	79	68	70	78	66	107.204	112	111	99	112	119	104
123	P262	40.708	37	45	41	38	44	39	52.4124	48	52	53	50	61	50	61.6225	59	61	62	62	68	58	96.5088	103	99	89	103	102	88
124	P264	48.2119	43	54	47	48	49	49	61.8378	56	66	63	61	67	58	69.4978	63	74	69	71	75	65	106.853	106	115	100	106	115	105
125	P266	39.5115	37	41	39	37	42	39	55.6448	51	54	55	55	64	53	64.0196	58	62	64	66	70	62	99.0432	99	104	94	99	102	97
126	P270	40.6969	38	43	42	39	41	40	51.596	49	52	53	52	54	49	61.2245	57	60	61	64	65	58	94.0324	93	98	93	93	98	89
127	P272	39.7375	37	43	40	38	40	39	52.2623	49	52	54	51	55	51	61.3162	56	60	63	63	65	59	98.0301	97	99	93	97	101	94
128	P274	45.4177	37	57	43	43	48	44	58.6831	47	66	60	58	64	57	66.533	57	64	67	70	76	65	103.197	96	113	99	96	110	104
129	P277	40.2085	37	43	41	39	42	39	51.8812	50	54	54	49	55	50	61.6582	58	61	62	63	65	60	101.102	108	107	98	108	100	99
130	P278	43.3085	40	47	42	42	47	42	56.7989	55	56	57	56	63	54	66.3975	60	70	65	69	70	64	103.346	105	109	97	105	114	97
131	P282	40.7502	39	41	41	39	44	40	53.3041	50	52	54	52	60	51	62.8207	61	63	63	62	67	61	102.533	108	108	94	108	104	99
132	P286	47.0108	43	49	46	43	54	48	61.9838	57	66	63	61	68	58	69.9137	64	75	70	70	75	66	105.672	105	113	100	105	117	105
133	P287	42.9154	42	46	41	42	45	41	54.4499	52	55	56	55	58	51	62.8847	60	62	64	65	65	61	97.535	105	96	86	105	103	95
134	P289	42.0153	41	47	40	41	44	40	52.7094	51	53	52	53	57	50	61.4881	57	62	61	64	65	58	96.5669	99	101	90	99	103	93
135	P291	36.4316	40	38	35	33	35	36	43.8699	49	45	44	43	45	45	56.0782	61	54	60	53	53	52	90.9219	99	95	83	99	85	85
136	P295	40.3504	36	45	39	40	42	40	54.7771	50	54	55	54	63	52	64.6697	65	65	64	66	69	59	100.12	97	107	94	97	104	96
137	P302	41.6029	44	44	39	39	43	40	57.9988	57	56	59	58	65	53	68.9269	69	74	66	69	75	63	104.139	107	107	98	107	114	103
138	P303	44.6006	40	48	45	41	48	46	59.2379	54	65	63	55	64	56	66.9267	60	73	68	67	70	64	104.967	108	111	98	108	114	103
139	P307	44.992	43	48	45	42	50	43	61.2769	50	66	64	60	67	55	68.5278	59	74	70	70	75	64	103.244	100	103	102	100	114	99
140	P308	42.6271	38	45	41	40	45	47	59.3115	51	63	63	59	65	55	67.5972	58	71	69	71	75	64	105.857	103	113	100	103	115	104
141	P311	48.1191	42	55	44	47	56	48	60.2062	51	67	61	59	66	57	68.8637	62	74	69	70	76	64	106.315	105	117	98	105	116	103
142	P313	43.9431	48	40	42	41	47	44	60.2104	61	49	63	61	68	56	69.128	73	55	72	73	77	64	103.618	110	88	103	110	111	103
143	P315	42.433	39	46	42	39	49	40	54.3606	51	57	56	48	65	49	62.971	59	68	64	60	67	58	100.971	100	110	97	100	112	97
144	P316	40.4304	38	46	39	37	42	40	55.6935	52	58	55	53	64	51	64.8128	60	68	63	64	75	59	102.819	102	118	97	102	113	97
145	P317	41.0184	40	42	40	40	43	40	51.7002	51	51	52	52	56	50	60.7604	57	59	61	63	64	58	96.3285	100	100	90	100	101	93
146	P318	41.4543	39	46	38	38	44	43	54.9251	50	56	52	53	63	54	64.4251	59	65	64	66	69	63	101.758	98	110	94	98	114	99
147	P319	41.7628	39	44	39	41	44	44	52.3651	50	53	50	53	56	53	61.8089	55	61	61	68	64	60	96.258	93	99	83	93	100	96
148	P321	39.752	37	40	39	40	42	40	50.4557	47	47	49	54	55	50	59.8241	56	56	59	63	65	58	95.035	95	94	87	95	104	95
149	P322	45.9201	39	55	42	43	49	48	62.6324	58	68	64	61	68	58	73.7851	75	81	76	70	78	67	107.642	108	122	101	108	119	105
150	P323	50.3362	46	56	49	46	56	51	65.3498	62	71	64	61	74	61	73.2153	67	79	73	71	84	69	109.712	109	120	102	109	120	108
151	P326	49.0324	43	54	45	48	55	51	62.9085	58	67	63	62	69	60	72.0589	64	76	69	72	82	71	104.671	103	114	96	103	115	103
152	P327	41.443	40	46	40	39	43	40	53.6858	50	56	52	52	60	52	62.8916	60	66	61	63	66	61	102.182	105	108	97	105	113	101
153	P328	43.7882	41	52	41	42	44	43	58.7675	53	65	60	57	62	55	67.031	60	75	66	69	69	64	104.059	98	115	98	98	114	99
154	P330	42.2506	39	49	42	40	43	40	56.1619	47	58	52	57	63	50	64.7067	58	69	64	69	70	58	102.451	100	109	94	100	114	99
155	P332	50.6617	47	56	49	48	56	51	66.2646	61	74	66	62	74	62	76.4632	75	83	77	72	83	71	110.873	113	121	102	113	122	111
156	P336	46.6204	43	49	45	45	50	48	62.5858	49	68	63	60	68	59	70.1062	62	77	71	71	76	65	106.91	105	116	101	105	114	105
157	P337	48.6005	44	55	48	47	50	48	61.5563	56	67	62	61	67	58	69.1303	65	73	69	70	75	64	104.456	104	112	99	104	115	102
158	P340	45.9623	42	48	49	44	48	46	58.6737	54	62	61	58	63	55	66.9612	62	71	66	69	70	64	102.839	101	111	98	101	103	102
159	P341	44.8615	41	49	41	43	49	47	62.5366	58	66	64	61	68	60	72.9921	69	80	74	70	77	71	108.804	108	122	101	108	118	106
160	P347	40.0573	37	45	39	37	41	40	57.5332	51	57	59	61	67	52	68.0125	62	72	65	71	76	63	104.977	101	114	98	101	115	101
161	P350	35.6972	37	40	34	32	36	34	51.329	49	56	47	50	56	49	61.2044	55	62	61	62	67	59	102.315	100	111	99	100	113	97
162	P353	45.5746	42	52	43	43	50	45	58.7286	55	62	61	57	65	53	66.9815	63	71	67	68	72	62	102.791	105	113	97	105	112	99
163	P360	37.5498	35	40	37	33	43	36	49.3807	47	48	51	42	58	48	59.6711	54	57	60	61	67	56	98.5647	91	106	93	91	106	97
164	P361	42.5931	40	47	40	40	47	42	59.117	46	65	61	56	64	53	68.0025	60	73	68	70	75	62	103.414	101	114	100	101	115	96
165	P362	40.4934	36	42	39	44	42	39	51.5002	47	52	50	54	55	50	60.8967	56	60	61	64	65	58	95.5231	97	94	93	97	98	90
166	P363	50.8384	43	53	49	49	63	51	63.0216	59	67	63	61	69	61	73.8758	70	79	73	70	84	70	110.364	112	118	108	112	122	110
167	P365	41.0851	38	46	39	39	42	43	52.2494	48	55	52	50	57	51	61.0543	57	62	61	60	64	60	96.4764	98	104	87	98	103	94
168	P366	46.2384	43	53	44	43	49	47	61.0206	48	67	61	57	66	60	68.5005	60	75	67	69	75	67	105.777	107	114	99	107	113	102
169	P369	48.1243	43	52	47	47	54	47	60.959	54	66	63	59	67	58	70.2172	67	76	70	70	76	64	107.273	108	115	102	108	115	104
170	P372	41.3494	41	45	41	39	42	40	51.9084	48	52	53	51	56	50	62.1314	59	62	61	65	65	58	96.451	97	101	88	97	101	96
171	P373	51.4756	44	60	48	47	62	51	64.7379	59	73	64	61	72	62	75.1362	71	82	76	71	83	71	110.853	114	122	102	114	123	111
172	P374	43.8497	41	51	43	41	47	41	59.5731	57	64	63	58	65	52	68.04	63	74	69	69	73	62	105.62	105	118	99	105	114	99
173	P375	42.9757	37	54	40	39	46	42	59.6555	45	66	60	60	65	54	67.5308	57	75	66	70	75	63	104.019	103	120	99	103	111	101
174	P378	39.3919	36	43	40	38	41	39	50.7992	47	50	52	50	55	49	60.8947	60	58	62	61	64	58	94.1413	106	89	91	106	91	92
175	P383	48.7449	44	55	45	46	56	49	62.8056	58	70	62	62	68	58	71.5747	64	78	70	69	81	70	106.992	107	120	103	107	118	104
176	P385	38.2656	43	36	37	33	48	44	44.4619	52	44	46	43	63	54	58.1451	61	52	58	57	72	63	91.1087	99	84	83	99	111	100
177	P386	46.8287	42	47	44	48	56	45	63.5844	63	65	65	62	72	55	74.1187	75	75	75	72	83	69	109.405	112	121	101	112	120	105
178	P389	50.7519	46	58	48	50	55	50	63.7328	53	70	64	62	69	60	71.7096	62	78	71	72	78	70	104.844	101	114	98	101	114	103
179	P390	40.1639	37	46	40	38	41	39	53.6891	43	56	54	52	57	50	63.0132	57	68	64	62	68	59	101.565	103	112	98	103	110	97
180	P392	44.3726	40	48	41	45	47	46	60.1747	56	64	62	60	65	56	67.5478	61	74	66	70	70	64	105.195	103	113	100	103	113	101
181	P393	44.2491	42	48	44	41	46	45	60.3063	56	63	61	61	67	54	70.6104	62	75	70	71	84	65	104.148	102	113	98	102	114	100
182	P395	39.8974	36	46	38	37	42	39	54.3136	50	55	54	52	64	51	65.0424	56	70	62	65	76	62	100.583	102	109	95	102	106	99
183	P399	41.0467	37	44	40	41	43	41	53.8936	52	53	54	54	59	50	61.7639	57	62	61	65	66	58	99.636	104	104	93	104	105	97
184	P403	48.9512	43	55	50	47	48	44	62.7754	57	67	64	62	63	54	71.228	65	75	74	72	72	63	107.32	108	120	102	108	111	100
185	P404	47.2957	43	52	46	46	48	44	61.4813	57	67	62	59	63	54	69.9536	64	75	70	71	72	63	107.867	107	120	101	107	111	100
186	P405	42.6479	40	48	42	41	44	41	54.0068	56	56	52	52	58	51	63.1989	62	65	60	67	66	59	99.2114	101	108	90	101	103	97
187	P410	48.1053	43	54	44	47	54	47	61.5869	48	66	63	59	68	57	69.2578	61	74	70	70	75	66	106.649	108	115	99	108	114	105
188	P412	47.4243	47	49	45	48	49	48	61.7153	60	66	62	60	66	57	70.697	68	74	67	70	75	71	109.319	111	121	102	111	115	108
189	P413	50.1306	50	52	48	50	54	48	63.7925	62	68	63	62	68	61	73.2564	73	80	70	71	78	72	109.622	112	122	102	112	120	108
190	P414	48.4346	43	51	49	46	55	48	61.7653	58	67	61	60	67	59	69.2039	64	74	69	70	75	65	106.892	106	115	98	106	117	107
191	P416	42.6468	39	45	41	42	47	41	56.6693	48	55	55	55	66	52	66.2955	62	62	63	70	76	65	103.621	101	111	96	101	114	99
192	P417	47.8108	42	56	43	45	54	49	61.936	58	68	62	60	68	57	72.0976	70	77	69	70	84	65	108.092	104	117	101	104	119	109
193	P419	46.3465	43	50	45	43	49	48	61.2705	58	61	63	61	68	58	71.6383	64	76	70	71	83	67	111.113	110	120	106	110	123	111
194	P422	39.7526	39	42	39	39	41	39	49.525	49	50	50	49	52	48	60.3875	59	57	61	62	64	58	94.9552	102	96	83	102	94	95
195	P423	41.2831	40	46	40	38	43	40	50.7564	49	50	49	50	56	49	60.9867	59	61	60	63	64	58	94.7032	98	99	83	98	96	95
196	P424	39.3258	37	46	36	34	42	40	55.3761	50	57	55	55	64	50	64.4132	59	69	63	65	72	59	100.585	101	108	94	101	110	97
197	P425	48.3718	43	55	45	44	55	49	62.7873	55	69	63	61	69	59	70.9712	61	79	72	69	81	65	104.995	102	112	100	102	114	100
198	P427	47.0847	43	54	44	46	50	47	59.9625	54	66	60	59	65	56	68.8352	62	75	68	70	75	63	105.652	108	112	98	108	116	103
199	P432	47.0817	47	47	45	46	49	48	61.8412	55	66	63	59	66	58	71.4504	65	78	71	70	76	70	108.821	110	121	102	110	118	107
200	P433	47.7322	47	52	45	47	49	46	61.4407	59	66	62	60	65	57	71.487	70	76	69	71	75	70	108.902	109	119	102	109	119	107
201	P440	39.7055	37	41	41	38	40	40	52.8592	50	55	55	51	57	50	62.3568	58	66	63	63	64	58	99.1715	101	111	93	101	101	95
202	P446	46.0489	45	54	45	44	48	42	57.3234	56	63	56	56	62	52	65.3736	62	67	64	69	69	61	101.125	106	108	93	106	104	98
203	P448	47.1902	41	55	42	44	56	48	59.5771	50	64	58	58	65	57	67.8118	59	73	65	69	76	64	105.558	99	117	99	99	118	104
204	P449	40.0096	38	41	39	39	42	39	50.9794	48	50	50	50	57	49	61.2729	59	58	61	64	65	58	101.705	110	111	91	110	103	98
205	P450	48.4181	43	55	45	51	50	48	62.0302	55	69	63	61	67	58	69.6434	61	76	69	71	75	69	105.667	102	115	99	102	115	104
206	P451	47.7845	42	53	46	48	52	47	62.2936	56	67	63	62	68	58	70.6523	67	74	70	72	76	67	109.646	106	121	102	106	119	107
207	P455	41.6893	37	47	41	40	45	40	54.9019	49	60	54	52	64	51	64.7253	56	72	63	70	68	60	100.075	99	109	93	99	104	103
208	P460	48.7084	42	55	47	48	54	48	64.0446	59	71	63	61	69	63	73.6142	67	80	74	71	80	72	110.394	108	123	105	108	121	111
209	P461	40.3027	38	38	39	36	48	41	50.7583	48	46	49	46	63	53	60.958	60	56	62	57	66	64	99.5252	99	105	95	99	110	99
210	P463	51.4844	45	65	49	48	56	50	68.2756	60	79	67	67	75	66	77.6278	71	87	77	79	85	72	112.681	115	123	108	115	124	113
211	P464	49.3845	44	55	46	47	55	50	62.0922	58	68	62	61	68	58	71.5499	69	76	69	71	76	71	109.905	110	120	102	110	121	109
212	P465	41.2005	39	46	40	39	43	40	51.2132	50	53	52	50	54	50	60.8695	58	62	61	60	64	58	94.5648	97	98	88	97	100	88
213	P467	42.0238	38	46	42	42	42	43	53.6619	50	54	55	54	57	53	62.4223	58	62	63	64	66	62	99.2662	98	100	96	98	103	98
214	P468	45.8274	41	55	42	41	49	47	59.8915	55	66	61	56	64	57	68.2384	61	75	67	69	74	64	102.156	100	115	96	100	112	97
215	P469	42.8846	39	48	41	43	45	41	53.9207	49	56	53	56	57	51	62.7397	58	62	61	69	65	59	98.2947	98	111	88	98	100	95
216	P471	45.3264	41	55	43	43	49	43	60.6944	54	65	66	59	66	54	69.7147	63	75	74	69	76	63	107.558	106	121	108	106	114	99
217	P475	44.3873	43	48	44	42	50	41	60.3561	52	65	63	59	63	56	67.8954	60	75	71	70	68	64	106.157	107	121	101	107	109	101
218	P477	47.858	40	56	45	46	55	48	64.9431	56	73	66	64	72	61	74.5724	65	80	76	76	84	69	108.586	105	121	102	105	118	108
219	P478	44.3842	38	50	44	44	49	43	58.9572	52	61	61	58	64	56	67.0903	59	72	69	70	70	64	107.124	104	121	98	104	118	109
220	P482	49.8532	46	56	46	48	55	50	65.5482	61	73	66	63	70	62	75.016	72	82	75	72	82	70	110.921	112	122	105	112	121	111
221	P483	49.4736	44	55	50	46	55	49	64.7825	59	69	65	63	73	62	73.4406	65	78	76	70	83	72	110.764	110	122	107	110	122	110
222	P484	39.6149	37	40	39	38	41	40	51.3208	49	54	52	48	54	50	63.0714	59	66	61	62	65	65	101.29	110	108	93	110	107	98
223	P486	41.0041	37	44	40	37	45	41	51.8912	49	50	52	50	57	52	60.66	57	58	60	64	64	58	98.8342	100	99	88	100	103	98
224	P489	51.6665	46	58	49	55	56	49	65.4508	60	70	65	69	69	62	75.5796	66	80	76	80	83	71	109.325	108	123	102	108	122	112
225	P490	42.6128	48	42	39	38	48	41	52.6852	53	53	52	51	60	51	62.2367	61	61	61	64	67	59	103.465	107	108	94	107	116	103
226	P491	42.0849	42	46	40	41	42	41	53.0315	50	55	52	53	56	51	61.8214	60	62	61	64	66	58	99.8009	107	104	91	107	98	98
227	P492	46.3387	42	54	43	45	49	46	60.9047	50	66	62	61	65	56	69.1101	60	75	71	71	75	64	104.992	108	115	98	108	112	98
228	P494	46.3514	47	48	43	44	49	47	60.8924	53	65	61	59	65	56	68.7577	63	73	66	70	76	65	106.402	108	115	99	108	114	103
229	P499	46.4203	42	50	46	46	49	46	61.5626	49	67	65	55	67	57	69.024	60	75	74	67	75	64	109.469	108	120	103	108	120	107
230	P500	45.2527	44	51	43	43	49	43	60.6043	50	67	62	58	67	55	69.0533	63	76	69	69	75	64	106.291	102	118	102	102	118	100
231	P501	48.5087	45	54	47	47	48	44	63.9031	61	68	65	62	63	54	73.2377	74	77	73	71	72	63	107.723	103	122	102	103	111	100
232	P502	45.5178	43	54	44	39	49	45	61.4505	48	67	63	59	67	56	69.3942	59	77	69	71	76	65	107.713	104	124	102	104	118	101
233	P503	44.9666	40	51	41	48	49	42	61.6846	58	67	62	61	68	57	69.9998	63	78	71	70	75	65	108.176	101	121	103	101	122	108
234	P504	48.3279	44	55	43	45	54	50	64.1508	50	71	65	58	70	62	72.9496	62	80	75	69	83	71	108.293	102	122	102	102	121	108
235	P505	47.7612	43	54	44	45	54	48	63.1469	60	69	63	61	69	58	72.1737	70	78	73	73	76	67	109.61	103	122	104	103	122	110
236	P507	46.9328	45	54	43	43	49	48	62.019	59	66	62	59	68	59	71.09	70	78	70	70	75	65	107.124	101	122	103	101	117	103
237	P508	48.2405	46	56	45	45	49	50	63.4078	61	67	65	61	68	60	74.2958	70	80	74	71	84	70	109.151	110	121	103	110	120	107
238	P509	49.2482	45	56	49	45	55	49	64.3847	61	70	64	66	69	59	74.303	69	79	74	74	84	68	107.244	108	121	99	108	120	101
239	P510	47.5418	43	54	42	45	55	48	61.0993	57	66	62	60	66	56	69.2233	62	74	69	71	75	66	105.062	107	116	99	107	113	100
240	P511	47.7322	43	54	44	44	55	47	61.1628	50	66	62	58	68	57	68.525	61	75	67	69	75	64	104.217	106	114	99	106	113	99
241	P512	47.9454	44	54	43	46	54	47	61.3809	57	67	61	61	67	56	69.7724	65	75	68	71	76	65	105.276	107	113	98	107	114	100
242	P514	46.0837	43	47	45	46	49	47	62.7323	59	70	63	60	69	57	73.5696	72	80	70	71	83	70	107.29	109	119	98	109	115	106
243	P515	40.499	36	51	37	38	41	40	56.1167	52	68	54	51	61	50	65.8892	59	81	61	64	69	61	98.7544	97	119	86	97	104	94
244	P516	43.0955	37	45	42	45	48	41	60.4643	55	64	62	60	66	56	69.2716	64	75	68	70	76	64	101.851	101	112	96	101	109	101
245	P520	45.1206	41	47	43	46	49	45	58.9003	56	57	60	59	65	57	67.7342	62	70	66	70	75	64	105.761	104	115	98	104	114	105
246	P522	52.1773	49	61	50	50	56	51	66.58	61	75	66	65	74	62	76.0888	75	84	76	74	83	70	112.041	116	124	105	116	122	110
247	P524	45.9761	44	52	43	42	49	47	63.3331	61	69	64	61	68	58	73.8855	73	81	73	70	83	67	108.836	110	121	101	110	119	106
248	P525	48.492	44	55	46	46	56	46	62.6997	58	69	64	59	69	58	72.0724	66	79	72	69	83	66	108	106	120	100	106	116	104
249	P533	45.6502	41	53	44	43	48	44	62.1767	57	67	63	60	63	54	70.1871	62	76	72	70	72	63	104.833	104	116	99	104	111	100
250	P534	43.8574	41	48	42	41	48	43	55.0683	52	57	54	52	60	56	64.0591	60	68	61	63	68	64	100.246	102	107	91	102	103	100
251	P538	51.4011	53	40	54	52	56	50	64.4162	58	50	66	66	74	63	72.9013	67	58	76	78	84	71	108.529	110	108	103	110	121	108
252	P541	46.6986	41	56	43	45	49	49	63.5559	58	73	63	63	68	59	73.8811	69	81	72	72	83	69	109.665	108	122	101	108	119	110
253	P542	48.4311	42	55	45	48	55	46	65.7069	57	78	67	59	74	60	74.754	63	85	76	71	84	72	109.603	109	122	105	109	122	108
254	P543	54.9661	53	62	52	52	59	54	68.4797	58	76	67	67	76	64	76.4475	65	83	76	80	85	72	112.9	111	124	108	111	123	112
255	P544	51.7417	47	59	48	52	56	51	64.5952	60	71	64	64	68	63	74.4671	71	80	72	74	83	71	110.023	113	117	101	113	119	110
256	P546	44.6521	40	48	42	43	48	47	59.3135	54	65	60	56	65	57	67.7091	62	74	66	67	76	64	103.886	103	112	95	103	115	102
257	P547	39.9048	39	42	37	39	42	41	57.3832	50	63	59	56	66	51	67.2435	58	73	65	69	76	63	104.736	104	113	98	104	115	98
258	P551	47.1879	44	55	42	45	50	48	65.0823	60	74	64	62	73	59	75.0802	71	82	72	73	84	71	109.409	108	122	103	108	119	107
259	P552	37.8375	37	40	36	34	41	38	50.0242	50	50	51	46	55	50	62.1326	60	62	62	59	67	62	101.313	107	107	95	107	106	96
260	P553	36.2332	33	36	38	32	43	34	50.2333	48	47	49	45	62	50	61.9984	58	61	61	59	69	63	100.118	98	101	97	98	109	97
261	P554	40.4237	39	41	40	40	44	37	53.5708	53	51	55	53	59	49	62.3331	58	61	62	65	68	59	98.9841	103	103	96	103	103	95
262	P555	41.7209	39	48	38	39	45	41	56.587	52	64	59	50	64	51	65.9788	57	71	67	68	74	60	104.594	101	115	96	101	113	104
263	P556	37.7147	36	41	37	34	40	37	52.3725	49	54	52	47	62	50	62.4044	58	63	65	58	69	60	101.389	101	111	96	101	102	99
264	P557	42.9381	41	45	43	42	44	41	54.7151	51	54	55	55	61	51	63.9618	59	63	63	66	68	63	99.9832	102	106	96	102	103	98
265	P559	40.8996	37	43	39	41	43	42	52.5864	50	54	50	54	58	50	61.6215	55	62	59	66	66	61	100.238	106	106	92	106	102	97
266	P560	39.048	33	43	39	39	41	39	50.3745	50	51	50	49	54	48	60.341	57	58	61	62	64	58	94.7421	95	96	93	95	93	95
267	P563	40.8524	41	40	41	40	42	40	53.3811	53	53	56	54	56	51	63.5707	61	62	64	64	66	62	98.9132	102	102	94	102	98	97
268	P565	38.1731	37	40	35	34	41	40	48.5421	49	52	46	46	54	48	59.8382	56	62	58	59	64	58	96.0829	100	99	93	100	92	94
269	P567	41.3042	39	42	41	42	43	39	52.6507	49	51	54	54	57	50	61.7559	59	62	62	64	65	58	96.0994	94	96	93	94	100	97
270	P568	37.9758	38	40	35	34	43	37	49.255	50	52	47	47	55	47	60.5933	59	61	60	60	64	58	96.0043	108	91	90	108	102	91
271	P569	40.3044	42	40	40	38	41	39	55.4831	54	55	56	53	63	52	63.4934	62	62	63	63	68	62	101.171	102	111	97	102	100	100
272	P570	40.6041	39	43	38	40	43	40	52.3648	50	54	50	53	58	50	61.2479	59	63	60	62	65	58	98.0959	102	105	93	102	100	95
273	P571	45.4648	42	54	42	41	49	46	60.0896	48	67	61	55	65	55	67.602	60	74	68	66	74	64	102.543	97	111	97	97	113	100
274	P572	49.6517	44	54	45	45	62	50	62.8213	58	69	64	59	71	58	72.9635	67	78	72	69	83	71	108.888	108	122	102	108	118	104
275	P573	41.9886	41	46	41	40	44	40	53.8339	52	55	49	53	63	50	62.5525	60	62	60	66	67	60	98.2819	99	111	88	99	103	96
276	P575	37.62	36	44	33	35	39	37	52.7698	52	57	51	51	56	53	61.819	58	68	59	62	65	58	98.1143	95	110	93	95	100	97
277	P576	41.2299	41	44	39	41	42	41	51.9163	52	53	50	54	54	51	62.2646	59	62	60	68	65	59	94.0389	99	98	84	99	92	94
278	P577	41.5248	42	43	36	43	44	41	52.4071	50	52	50	55	56	50	62.3687	63	61	61	65	64	58	97.4076	101	101	90	101	103	90
279	P578	40.7988	39	42	39	39	45	40	52.389	51	52	52	53	57	51	61.1226	58	60	61	63	65	58	97.2846	99	100	91	99	102	94
280	P579	44.0964	41	49	44	41	47	43	60.8534	48	65	63	60	68	53	69.472	61	75	68	71	83	61	107.054	108	122	102	108	120	97
281	P580	52.0009	46	56	50	48	63	51	67.7702	62	75	67	66	75	64	78.3083	75	84	76	81	84	73	110.2	108	124	102	108	120	110
282	P583	42.3533	41	48	39	38	45	44	58.1109	56	57	59	57	66	54	68.7388	65	74	66	69	75	64	104.982	100	118	96	100	116	102
283	P584	45.2892	40	52	43	42	49	47	61.3312	57	65	63	58	68	58	72.1028	68	79	70	70	78	70	107.048	108	116	100	108	118	106
284	P585	47.6054	46	51	44	47	51	49	64.4944	61	68	65	63	69	63	74.2747	67	78	74	73	84	72	111.283	112	122	102	112	122	109
285	P586	45.3289	44	49	44	41	48	47	63.8274	53	70	65	62	70	59	72.9631	62	79	74	72	84	69	109.409	104	123	103	104	122	109
286	P587	42.7564	40	48	43	40	44	40	54.9253	51	56	54	53	63	51	64.4101	64	68	63	64	69	59	100.608	106	107	95	106	103	95
287	P588	42.6801	45	43	41	42	45	41	54.8923	53	53	54	54	62	51	63.728	61	62	63	65	69	64	99.929	99	105	94	99	102	97
288	P589	46.7888	45	51	43	44	49	49	62.072	53	68	62	60	68	58	69.9785	62	78	70	71	75	65	108.179	108	116	101	108	118	107
289	P596	45.1503	41	50	44	43	49	44	62.9556	58	73	63	60	68	57	72.8832	63	81	72	71	84	70	109.564	113	122	101	113	120	105
290	P602	50.0102	43	57	46	50	56	49	64.5515	58	73	66	63	70	59	73.2367	63	81	75	73	83	68	111.912	115	123	108	115	121	108
291	P603	51.8168	44	57	49	51	62	51	65.8883	59	75	66	63	73	62	75.5038	73	83	75	72	83	71	111.856	115	124	108	115	124	113
292	P607	37.2401	35	42	35	37	38	35	49.7126	48	52	50	47	54	48	60.9074	59	62	61	60	65	58	100.14	108	114	88	108	103	97
293	P608	41.6237	37	44	41	42	45	41	53.5653	51	53	56	54	58	49	62.8315	64	63	63	65	66	58	99.8374	101	104	95	101	103	96
294	P611	40.798	39	42	40	40	43	40	53.8091	50	54	54	55	59	50	62.2591	60	62	61	63	67	58	95.2548	95	101	88	95	97	89
295	P612	37.7123	36	39	34	36	41	38	47.4696	46	47	45	47	52	49	59.3671	59	58	59	58	62	58	96.3009	97	100	93	97	97	97
296	P613	39.2791	37	44	38	37	41	39	52.9504	50	55	55	51	55	50	61.5487	57	62	62	63	65	59	98.8945	98	101	93	98	100	96
297	P614	42.7869	47	45	42	41	42	41	52.8892	55	54	57	51	54	51	62.1505	63	62	62	62	64	58	98.3637	100	103	98	100	100	95
298	P615	42.0293	40	45	41	40	44	42	54.8176	52	55	55	53	61	53	64.3255	62	68	62	63	68	61	100.656	99	111	96	99	109	94
299	P617	37.8071	37	40	37	33	39	40	50.5874	48	52	51	46	58	48	61.0682	58	61	61	60	66	59	95.1825	98	100	93	98	101	89
300	P618	38.032	38	40	34	34	40	40	50.6216	47	52	46	48	59	50	61.1247	60	61	58	59	67	60	99.1485	105	101	93	105	103	89
301	P623	44.609	41	48	43	46	49	42	57.953	52	61	59	60	64	52	65.6383	59	71	66	70	68	60	101.167	100	108	97	100	111	97
302	P624	37.6056	37	40	35	34	40	38	50.3786	50	52	51	48	55	49	60.7964	56	60	62	61	65	58	97.7655	100	105	94	100	102	89
303	P625	38.9926	39	40	39	36	40	39	51.0721	52	51	54	49	55	49	61.3316	58	61	62	62	65	58	96.9048	99	101	96	99	101	89
304	P626	38.7712	37	40	38	36	40	39	50.8298	48	49	52	49	55	49	62.1777	58	61	62	70	64	58	100.07	105	108	97	105	102	95
305	P627	38.2034	37	40	37	38	39	38	50.7886	50	50	51	50	54	48	60.5386	57	58	62	62	64	58	96.8714	97	105	93	97	99	89
306	P633	43.5714	39	48	41	41	49	44	60.4118	48	64	61	60	66	54	68.5921	57	75	71	71	75	64	108.329	107	120	102	107	121	107
307	P638	41.0256	40	43	39	40	42	40	53.4971	49	54	52	52	56	51	61.4804	62	62	58	63	65	58	97.4893	101	98	94	101	102	93
308	P639	39.012	37	44	37	35	42	39	57.733	52	64	59	54	67	51	67.7008	58	75	66	68	76	63	108.721	109	120	100	109	120	106
309	P640	35.5149	38	34	34	33	37	34	45.6999	50	44	45	45	49	46	58.9354	60	55	59	56	64	57	98.6032	100	105	94	100	103	97
Note: 18 and 19 represent the years of 2018 and 2019, DT :Dangtu; JP:Jiangpu; 2019YC6 and 2019YC7 means the planting date of June and July in Yancheng city, respectively.
