# Supplementary material for: Genome-Wide Association Study to Map Genomic Regions Related to the Initiation Time of Four Growth Stage Traits in Soybean
Source: Front Genet. 2021 Sep 14;12:715529. doi: 10.3389/fgene.2021.715529 (PMC8476948; doi:10.3389/fgene.2021.715529)
Supplement: Supplementary Table 3 — Details of eight QTN regions associated with four growth stage traits via FarmCPU method in summer soybeans. [file Table_3.XLSX]

## Sheet: Sheet1
Supplementary Table 3. Details of eight QTN regions associated with four growth stage traits via FarmCPU method in summer soybeans.
Regiona	Chromosome	No.b	SNP	Positon (bp)c	-log10(P)	MAF	PVE(R2 %)	Effect	Position (Mb)d	Trait-environmente
qGm02-1	2	2	Gm02_150932	150932	6.27385	0.488673	1.99	1.56089	0.15-0.16	DMI_18YC
			Gm02_157842	157842	5.08172	0.488673	1.97	0.939665	0.15-0.16	DPB_19YC6
			Gm02_157842	157842	5.23311	0.488673	3.83	0.779146	0.15-0.16	DMI_BLUP
			Gm02_157842	157842	5.02949	0.488673	4.91	1.1318	0.15-0.16	DMI_18JP
			Gm02_157842	157842	5.02949	0.488673	4.91	1.1318	0.15-0.16	DMI_19JP
qGm06-1	6	1	Gm06_16710123	16710123	4.86161	0.0711974	1.28	1.25465	16.71	DMI_BLUP
			Gm06_16710123	16710123	4.94973	0.0711974	2.93	2.21363	16.71	DMI_19DT
			Gm06_16710123	16710123	5.64854	0.0711974	3.12	2.11347	16.71	DMI_19YC7
qGm06-2	6	1	Gm06_19332290	19332290	12.9347	0.0809061	4.91	-2.31418	19.33	DF_19YC7
			Gm06_19332290	19332290	8.25205	0.0809061	1.44	-1.66209	19.33	DPB_BLUP
			Gm06_19332290	19332290	9.32326	0.0809061	4.93	-2.6319	19.33	DPB_19DT
			Gm06_19332290	19332290	6.36226	0.0809061	5.77	-1.74444	19.33	DPB_19JP
			Gm06_19332290	19332290	7.41556	0.0809061	2.52	-1.72645	19.33	DSF_19DT
qGm06-3	6	2	Gm06_20986297	20986297	5.90764	0.0841424	2.74	1.76853	20.99-21.07	DF_18YC
			Gm06_20986297	20986297	7.63029	0.0841424	4.13	2.19302	20.99-21.07	DF_19YC6
			Gm06_21072696	21072696	10.9125	0.0841424	3.64	-2.01654	20.99-21.07	DF_18JP
qGm10-1	10	3	Gm10_44346474	44346474	10.1326	0.343042	7	2.11371	44.35-44.55	DMI_18YC
			Gm10_44346474	44346474	11.8204	0.343042	4.7	2.40281	44.35-44.55	DMI_19YC6
			Gm10_44346474	44346474	9.66863	0.343042	6.53	1.36133	44.35-44.55	DPB_18JP
			Gm10_44378814	44378814	11.5367	0.339806	5.34	-1.31667	44.35-44.55	DF_18JP
			Gm10_44378814	44378814	9.33925	0.339806	5.1	-1.14042	44.35-44.55	DF_19DT
			Gm10_44378814	44378814	11.4215	0.339806	6.81	-1.43192	44.35-44.55	DF_19JP
			Gm10_44378814	44378814	7.80408	0.339806	3.94	-1.44755	44.35-44.55	DF_19YC6
			Gm10_44378814	44378814	12.5869	0.339806	5.18	-1.40315	44.35-44.55	DF_19YC7
			Gm10_44378814	44378814	10.6383	0.339806	2.39	-1.11941	44.35-44.55	DF_BLUP
			Gm10_44378814	44378814	9.73075	0.339806	5.25	-1.53152	44.35-44.55	DMI_19DT
			Gm10_44378814	44378814	7.83296	0.339806	5.5	-1.5985	44.35-44.55	DMI_19YC7
			Gm10_44378814	44378814	15.6981	0.339806	4.43	-1.69454	44.35-44.55	DMI_BLUP
			Gm10_44378814	44378814	6.71236	0.339806	6.42	-1.43142	44.35-44.55	DPB_18YC
			Gm10_44378814	44378814	14.9711	0.339806	7.66	-1.81574	44.35-44.55	DPB_19JP
			Gm10_44378814	44378814	11.188	0.339806	4.94	-1.64684	44.35-44.55	DPB_19YC6
			Gm10_44378814	44378814	14.0551	0.339806	5.89	-1.59997	44.35-44.55	DPB_BLUP
			Gm10_44378814	44378814	9.05943	0.339806	7.02	-1.87581	44.35-44.55	DSF_18YC
			Gm10_44378814	44378814	8.51601	0.339806	5.18	-1.2523	44.35-44.55	DSF_19DT
			Gm10_44378814	44378814	10.0075	0.339806	5.91	-1.26319	44.35-44.55	DSF_19JP
			Gm10_44378814	44378814	13.445	0.339806	7.59	-1.52347	44.35-44.55	DSF_19YC7
			Gm10_44378814	44378814	21.7581	0.339806	3.66	-2.05187	44.35-44.55	DSF_BLUP
			Gm10_44526814	44526814	7.80943	0.0550162	4.34	-2.59504	44.35-44.55	DSF_19YC6
			Gm10_44550928	44550928	6.03126	0.378641	4.86	-1.16826	44.35-44.55	DPB_19DT
qGm11-1	11	3	Gm11_15949297	15949297	5.49002	0.339806	2.45	-1.73273	15.95-15.96	DMI_18YC
			Gm11_15949389	15949389	6.23625	0.339806	2.04	1.03483	15.95-15.96	DSF_BLUP
			Gm11_15949389	15949389	7.05866	0.339806	3.7	1.19426	15.95-15.96	DSF_19DT
			Gm11_15963231	15963231	6.01629	0.28479	3.36	-1.28616	15.95-15.96	DPB_19YC6
			Gm11_15963231	15963231	7.91878	0.28479	3.45	-1.29155	15.95-15.96	DMI_BLUP
			Gm11_15963231	15963231	5.88119	0.28479	3.29	-1.3923	15.95-15.96	DMI_19DT
qGm15-1	15	4	Gm15_29754006	29754006	10.2684	0.0970874	0.51	1.33851	29.75-29.99	DF_BLUP
			Gm15_29967480	29967480	5.41963	0.0970874	1.66	-0.99393	29.75-29.99	DF_19DT
			Gm15_29990587	29990587	5.43695	0.194175	2.4	1.16618	29.75-29.99	DF_19JP
			Gm15_29967480	29967480	5.36341	0.0970874	1.58	-1.29475	29.75-29.99	DF_19YC6
			Gm15_29990587	29990587	7.4022	0.194175	4.24	1.86659	29.75-29.99	DMI_19DT
			Gm15_29990587	29990587	11.7145	0.194175	4.61	1.95234	29.75-29.99	DPB_19JP
			Gm15_29990587	29990587	9.13709	0.194175	2.94	1.60264	29.75-29.99	DPB_BLUP
			Gm15_29838416	29838416	5.05138	0.190939	2.23	1.10252	29.75-29.99	DSF_19DT
			Gm15_29990587	29990587	8.34332	0.194175	2.75	1.32191	29.75-29.99	DSF_19JP
qGm17-1	17	2	Gm17_37676700	37676700	7.40821	0.239482	3.04	1.06326	37.68-37.79	DMI_BLUP
			Gm17_37787347	37787347	5.59997	0.249191	2.4	-0.605776	37.68-37.79	DF_BLUP
			Gm17_37787347	37787347	6.56589	0.249191	3.26	-1.01304	37.68-37.79	DF_19YC6
			Gm17_37787347	37787347	5.55151	0.249191	2.69	-0.701381	37.68-37.79	DF_19YC7
a: QTN regions which was detected at least for three environments in single GST trait.
b: The number of significant SNPs identified in the region.
c: QTN position (bp) on soybean genome assembly Wm82.a2.v1.
d: Interval range in each QTN rgion.
e: The trait-environment combination of QTN. DF- days to flowering; DPB-days to pod beginning; DSF- days to seed formation; DMI- days to maturity initiation. 18 and 19 represent the years of 2018 and 2019, DT :Dangtu; JP:Jiangpu; 2019YC6 and 2019YC7 means the planting date of June and July in Yancheng city, respectively.
